# Supplementary material for: Water-Rock Interaction Processes: A Local Scale Study on Arsenic Sources and Release Mechanisms from a Volcanic Rock Matrix
Source: MDPI journal article supplement (doi:10.3390/toxics10060288), 2022-05-27
Supplement: s1 [file s1]

# Water-Rock Interaction Processes: A Local Scale Study on Arsenic Sources and Release Mechanisms from a Volcanic Rock Matrix

Daniele Parrone \*, Stefano Ghergo, Elisabetta Preziosi and Barbara Casentini

**Table S1.** Chemical analysis of the two solutions used for the first experiment.

| Parameter                             | As-Free Groundwater | Synthetic Water |
|---------------------------------------|---------------------|-----------------|
| pH                                    | 7.2                 | 5.7             |
| DO (mg/L)                             | 8.0                 | 8.0             |
| Eh (mV)                               | 210                 | 250             |
| El. Cond. ( $\mu\text{S}/\text{cm}$ ) | 634                 | 70              |
| F (mg/L)                              | 0.5                 | -               |
| Cl (mg/L)                             | 27.7                | -               |
| Br (mg/L)                             | 0.05                | -               |
| NO <sub>3</sub> (mg/L)                | 4.9                 | 31.2            |
| PO <sub>4</sub> (mg/L)                | 0.03                | -               |
| SO <sub>4</sub> (mg/L)                | 49.3                | -               |
| HCO <sub>3</sub> (mg/L)               | 268.5               | -               |
| Na (mg/L)                             | 30.0                | -               |
| Mg (mg/L)                             | 13.8                | -               |
| K (mg/L)                              | 3.9                 | 19.7            |
| Ca (mg/L)                             | 67.5                | -               |
| Al ( $\mu\text{g}/\text{L}$ )         | 4.0                 | -               |
| V ( $\mu\text{g}/\text{L}$ )          | 0.6                 | -               |
| Mn ( $\mu\text{g}/\text{L}$ )         | 1.5                 | -               |
| As ( $\mu\text{g}/\text{L}$ )         | 0.4                 | -               |
| Ba ( $\mu\text{g}/\text{L}$ )         | 38.8                | -               |
| U ( $\mu\text{g}/\text{L}$ )          | 1.1                 | -               |

**Table S2.** Comparison of the main statistics for all the analyzed parameters, distinguished between northern and southern sector.

| Parameter.                            | Mean  |       | Median |       | Min   |       | Max    |       | Std. Dev. |       |
|---------------------------------------|-------|-------|--------|-------|-------|-------|--------|-------|-----------|-------|
|                                       | North | South | North  | South | North | South | North  | South | North     | South |
| Eh (mV)                               | 253   | 207   | 279    | 227   | -323  | -177  | 546    | 294   | 156       | 82    |
| T (°C)                                | 15.9  | 17.2  | 15.7   | 17.3  | 14.6  | 13.1  | 18.0   | 20.4  | 0.9       | 1.6   |
| pH                                    | 6.2   | 7.7   | 6.1    | 7.7   | 5.4   | 7.0   | 7.3    | 8.6   | 0.5       | 0.3   |
| O <sub>2</sub> (mg/L)                 | 5.2   | 6.3   | 4.9    | 7.1   | 0.1   | 0.1   | 9.2    | 9.7   | 2.9       | 2.6   |
| El. Cond. ( $\mu\text{S}/\text{cm}$ ) | 618   | 613   | 557    | 605   | 245   | 449   | 2660   | 1025  | 440       | 119   |
| F (mg/L)                              | 1.3   | 1.8   | 1.1    | 1.4   | 0.3   | 0.7   | 3.5    | 4.0   | 0.7       | 0.9   |
| Cl (mg/L)                             | 19.5  | 33.1  | 18.7   | 32.3  | 10.6  | 16.4  | 35.3   | 67.6  | 4.9       | 10.6  |
| NO <sub>3</sub> (mg/L)                | 16.0  | 12.0  | 13.3   | 11.8  | 0.7   | 1.7   | 50.7   | 37.2  | 10.9      | 7.3   |
| PO <sub>4</sub> (mg/L)                | 1.50  | 0.15  | 1.59   | 0.10  | 0.46  | 0.04  | 2.62   | 0.84  | 0.52      | 0.15  |
| SO <sub>4</sub> (mg/L)                | 49.0  | 17.8  | 8.8    | 12.0  | 3.7   | 3.7   | 1018.6 | 122.6 | 178.1     | 21.0  |
| HCO <sub>3</sub> (mg/L)               | 258.0 | 274.1 | 224.5  | 263.5 | 36.6  | 176.9 | 966.2  | 434.3 | 205.7     | 61.3  |
| Na (mg/L)                             | 26.9  | 38.5  | 26.4   | 34.4  | 15.2  | 23.8  | 59.3   | 70.6  | 9.1       | 12.5  |
| Mg (mg/L)                             | 15.9  | 10.4  | 12.0   | 9.8   | 4.1   | 5.5   | 132.0  | 19.7  | 22.2      | 3.3   |
| K (mg/L)                              | 45.1  | 40.0  | 44.1   | 37.9  | 12.1  | 28.4  | 138.0  | 57.3  | 24.5      | 8.0   |

|           |       |      |      |      |      |      |        |       |       |       |
|-----------|-------|------|------|------|------|------|--------|-------|-------|-------|
| Ca (mg/L) | 55.3  | 48.3 | 41.9 | 42.1 | 10.3 | 29.5 | 378.0  | 131.8 | 66.9  | 19.6  |
| Li (µg/L) | 27.4  | 26.0 | 22.3 | 21.6 | 5.4  | 9.6  | 121.0  | 73.3  | 26.5  | 14.1  |
| B (µg/L)  | 88.4  | 93.5 | 78.5 | 83.7 | 37.3 | 47.8 | 212.0  | 256.0 | 41.9  | 43.7  |
| Al (µg/L) | 88.2  | 23.8 | 46.0 | 3.9  | 5.8  | 0.1  | 1006.0 | 471.0 | 175.7 | 77.6  |
| V (µg/L)  | 42.6  | 27.7 | 40.9 | 27.1 | 1.1  | 0.4  | 99.4   | 66.2  | 18.8  | 14.1  |
| Cr (µg/L) | 0.9   | 1.0  | 0.9  | 1.1  | 0.2  | 0.4  | 1.9    | 2.1   | 0.5   | 0.4   |
| Mn (µg/L) | 102.9 | 12.8 | 4.1  | 0.7  | 0.2  | 0.1  | 1904.2 | 282.0 | 346.9 | 47.0  |
| Fe (µg/L) | 160.6 | 84.7 | 15.4 | 17.1 | 5.8  | 0.9  | 3953.0 | 887.2 | 696.6 | 194.4 |
| Ni (µg/L) | 1.1   | 0.4  | 0.7  | 0.2  | 0.2  | 0.1  | 5.3    | 2.2   | 1.4   | 0.5   |
| Cu (µg/L) | 1.9   | 0.8  | 0.8  | 0.4  | 0.2  | 0.1  | 13.5   | 4.5   | 2.6   | 1.0   |
| Zn (µg/L) | 26.4  | 16.5 | 7.2  | 9.6  | 1.1  | 0.5  | 256.0  | 88.1  | 55.0  | 19.9  |
| As (µg/L) | 18.8  | 23.0 | 15.4 | 20.8 | 0.2  | 4.7  | 50.6   | 50.2  | 11.0  | 12.2  |
| Se (µg/L) | 0.2   | 0.3  | 0.2  | 0.2  | 0.2  | 0.1  | 0.3    | 1.1   | 0.0   | 0.2   |
| Ba (µg/L) | 55.9  | 58.4 | 44.5 | 54.8 | 8.3  | 1.6  | 193.0  | 155.0 | 44.5  | 29.9  |
| U (µg/L)  | 1.8   | 9.8  | 0.8  | 6.6  | 0.2  | 0.9  | 13.9   | 34.6  | 2.6   | 9.3   |

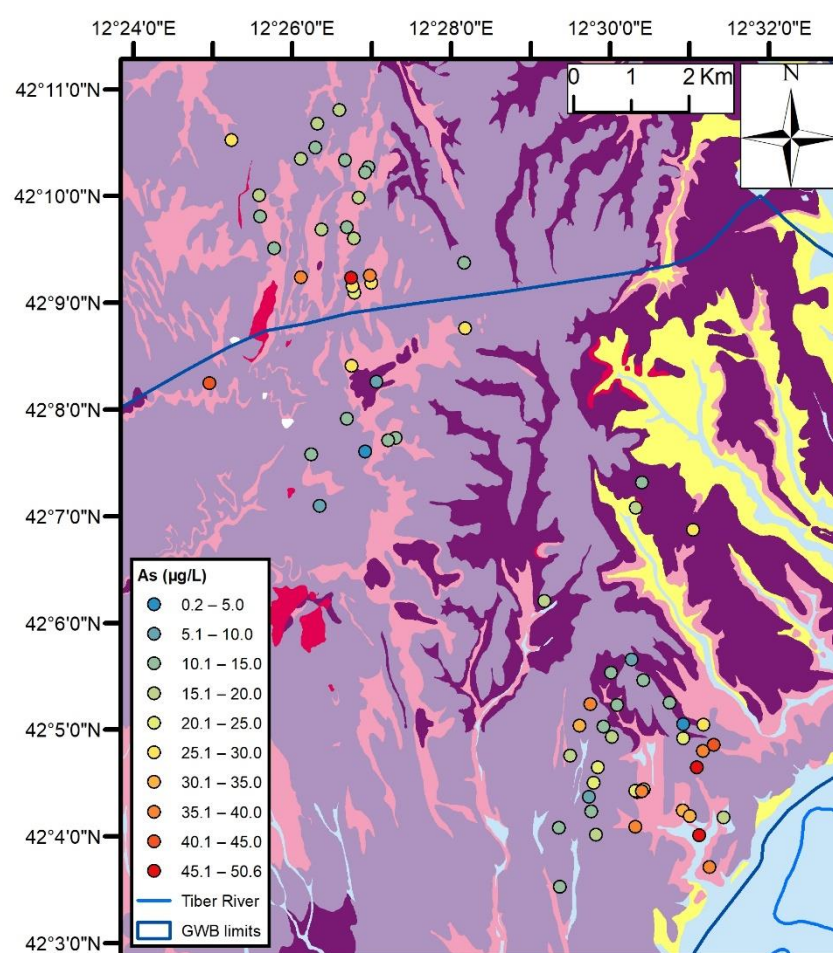

Figure S1. Distribution of as concentrations in groundwater of the study area.
